# Supplementary material for: Immunocompetent mouse model for Crimean-Congo hemorrhagic fever virus
Source: eLife. 2021 Jan 8;10:e63906. doi: 10.7554/eLife.63906 (PMC7811403; doi:10.7554/eLife.63906)
Supplement: Figure 1—source data 1. [file elife-63906-fig1-data1.xlsx]

## Sheet: Figure 1
Fig1A & B
DPI	Mock								Hoti ♂								Hoti ♀								MA-CCHFV ♂								MA-CCHFV ♀
0	100	100	100	100	100	100	100	100	100	100	100	100					100	100	100	100					100	100	100	100					100	100	100	100
1	100.84	101.282	98.8281	99.5781	99.4924	100	98.2558	102.139	101.923	96.3855	96.9027	98.6842					98.8636	99.4012	100.559	98.8571					99.2157	98.7069	100	99.1379					100.5	97.5124	97.191	101.676
2	101.26	101.709	100.781	101.688	99.4924	102.222	96.5116	100.535	101.923	97.1888	96.0177	98.2456					97.7273	98.2036	100.559	100					99.2157	100.862	100	98.2759					100.5	95.5224	96.6292	105.028
3	102.101	103.846	103.906	106.751	97.4619	100.556	98.2558	101.604	103.077	99.5984	96.0177	101.754					100.568	98.8024	103.911	102.857					96.4706	96.5517	99.1416	96.5517					102	95.5224	96.6292	106.145
4	105.462	103.846	100.391	107.595	96.9543	98.8889	99.4186	101.604	103.846	102.008	99.115	104.825					102.841	101.198	107.263	102.286					96.4706	93.5345	97.4249	97.4138					101.5	95.0249	95.5056	108.939
5	102.941	105.556	103.516	106.751	97.4619	103.889	100.581	105.348	107.692	102.41	101.77	105.702					103.977	104.79	104.469	102.857					89.4118	91.3793	89.6996	90.0862					99	95.5224	93.8202	111.732
6	103.782	105.556	101.172	105.063	97.9695	103.889	102.326	101.604	104.615	104.016	102.212	107.018					105.114	101.198	97.7654	99.4286					84.3137	83.1897	87.1245	84.0517					103	99.5025	98.8764	112.849
7	104.202	105.128	103.906	103.797	96.4467	104.444	96.5116	103.209	105.385	102.811	102.655	108.333					101.136	100.599	103.911	101.143					89.0196	88.7931	87.5536	90.0862					105.5	100	105.618	113.408
8	101.26	102.991	101.953	103.376	94.4162	100	97.093	103.209	107.692	101.205	101.327	104.825					97.7273	95.2096	103.352	98.2857					93.3333	94.8276	89.6996	93.9655					102	94.5274	105.056	109.497
9	105.042	106.838	103.516	106.329	96.9543	102.222	102.907	104.813	105	102.811	102.212	107.895					101.136	98.8024	105.028	98.8571					99.6078	102.586	97.8541	100					103.5	98.01	106.18	111.732
10	104.202	108.12	104.297	106.329	96.9543	100.556	103.488	104.813	108.846	101.606	106.195	107.456					103.977	97.6048	104.469	98.2857					100	102.586	102.146	101.293					101.5	105.97	105.618	111.732
11	106.723	109.402	104.297	108.439	100.508	105.556	105.814	105.348	109.231	105.221	104.867	109.211					105.682	101.796	102.235	100.571					101.961	102.586	100.429	102.586					103.5	100	108.989	111.732
12	105.882	109.402	105.078	106.751	96.4467	105.556	102.326	100	110.769	104.819	106.195	110.088					104.545	99.4012	106.145	106.286					102.353	105.603	100	102.155					100.5	96.5174	103.371	111.732
13	105.462	108.12	105.078	108.439	98.4772	102.778	102.907	101.604	98.4615	106.024	106.195	111.403					101.136	98.8024	106.704	101.143					101.176	106.897	100.858	105.172					101.5	98.01	104.494	110.615
14	107.983	108.974	103.125	109.283	97.9695	101.667	105.814	101.07	111.538	106.426	106.195	111.404					102.841	101.198	102.793	102.857					100	106.466	100.858	105.172					103	94.0299	103.933	111.732
Fig 1 C
DPI	10,000 TCID50							100 TCID50							1 TCID50							0.01 TCID50
0	100	100	100	100	100			100	100	100	100	100			100	100	100	100	100			100	100	100	100	100
1	97.8	100.4	97.8	98.4	96.3			99.6	100.8	100	99.6	99.2			102.7	103.3	98.9	100.9	102.6			100.4	98.2	102.4	102.7	100.4
2	99.6	99.6	98.7	98.8	98.3			100.8	102.9	102.2	103.7	100			104.9	104.6	99.6	103.1	103.5			103.7	102.7	104.4	104.2	102.5
3	96.5	97.8	96.5	93.9	95.4			99.2	102.5	102.2	100	100.8			105.3	104.6	100.4	103.6	103.1			102.1	105.4	102.4	104.2	103.7
4	93.4	95.2	92.5	92.7	91.7			95.7	96.7	99.6	96.7	95.9			106.2	104.6	101.1	101.8	105.7			103.7	103.6	105.6	105.8	103.3
5	87.2	87.3	87.3	86.2	84.2			90.2	93.8	91.7	92.2	93			104.9	103.3	98.9	101.3	104.4			102.9	103.6	105.6	107.3	104.1
6	87.7	84.7	85.1	84.1	82.6			86.7	88.1	87.8	87.2	91.7			103.1	105.9	95.8	99.6	104.8			102.5	102.2	107.2	107.7	105.8
7	93.8	89.1	87.7	85.8	87.1			91.4	92.2	91.3	88.9	98.8			107.5	107.9	97.3	100.9	116.2			102.9	104.5	107.6	112.4	105.8
8	97.8	92.6	93.4	92.3	88.8			96.1	97.9	96.5	97.5	100			108	107.9	94.6	103.1	114.4			105.8	105.8	108	112.7	109.5
9	98.7	98.7	100	100	95.9			100.8	101.6	103.5	104.5	105			108.8	108.4	99.2	107.6	119.2			104.1	106.3	109.6	110.4	108.7
10	101.8	99.6	101.3	98	97.9			101.6	102.1	103	103.3	102.1			107.5	107.5	97.3	104	117			105.4	105.4	110.4	112.4	109.5
11	102.6	103.1	101.8	100.8	99.2			101.2	102.9	104.3	106.6	102.9			130.5	107.9	98.1	104.5	118.3			104.1	104	112	112	109.1
12	106.2	102.2	101.8	100	101.7			104.3	101.6	104.3	107	103.7			107.1	108.8	95	103.6	117.9			105.4	105.8	111.6	113.1	110
13	104	103.5	101.8	101.2	100.4			102	102.5	103	104.5	103.7			108.4	109.2	100.8	102.7	117.5			104.1	104	115.5	106.6	107.5
14	104.8	103.5	101.8	99.6	102.5			103.5	108.2	103	106.2	104.1			110.2	109.6	95	103.1	119.7			106.2	105.8	115.5	108.1	107.9
Fig 1D
DPI	10,000 TCID50							100 TCID50							1 TCID50							0.01 TCID50
0	100	100	100	100	100			100	100	100	100	100			100	100	100	100	100			100	100	100	100	100
1	101.2	97.4	98.3	96.9	97.8			100.5	101.6	98.7	102.2	98.9			101	103	101.7	98.8	98.3			100	102.2	97.9	100	99.4
2	104	100	97.1	99.5	100.5			104.8	104.2	102.5	102.2	101.1			104.1	104.2	105.2	101.2	101.7			102.7	104.4	98.4	100.5	101.2
3	100	94.8	93.7	96.9	97.3			102.2	103.2	103.8	101.1	100.6			103.6	103.6	104.6	102.3	103.9			102.1	105	98.9	102.6	99.4
4	96	93.2	92	95.8	96.8			98.4	98.9	100.6	96.1	100.6			104.1	103.6	108.6	103.5	101.7			103.2	110.5	100.5	100.5	101.7
5	94.8	91.1	89.1	91.7	96.2			95.2	96.8	97.5	93.9	94.5			102.5	100	108.6	102.3	102.2			102.1	106.6	100	99.5	102.3
6	101.2	94.3	90.3	95.3	102.2			96.8	103.7	101.9	97.2	96.1			102	103	103.4	103.5	102.2			104.8	108.8	105.3	101.1	101.2
7	101.2	98.4	97.1	98.4	103.2			106.5	103.2	105.1	103.4	105			108.1	103.6	105.2	106.4	104.4			105.3	106.6	104.3	101.1	102.9
8	103.5	102.6	98.3	97.9	106.5			105.4	105.8	101.9	101.7	105.5			106.1	102.4	108.6	104.6	103.9			107.5	108.3	103.2	104.8	105.8
9	107.5	103.6	100	100	107			105.4	107.9	103.8	102.8	110.5			107.6	104.8	105.2	110.4	103.3			107.5	108.3	104.8	105.8	104.7
10	102.3	103.1	98.3	101	105.9			104.3	107.9	100	100.6	107.2			109.6	103.6	103.4	104	106.7			109.6	111.6	103.7	104.2	104.7
11	104	100.5	98.3	102.6	107.6			103.8	106.9	100.6	100	105.5			110.2	106.6	104	111.6	102.8			108.6	108.8	104.3	106.3	104.1
12	104	101	100	101	107			102.7	107.9	98.7	100.6	105.5			110.7	103	104	106.4	100			108.6	108.8	102.1	101.1	100.6
13	103.5	98.4	96	100	103.2			100.5	107.4	96.8	98.3	102.2			108.6	103.6	103.4	107.5	98.3			108	106.1	104.3	102.6	101.2
14	101.2	99.5	98.3	96.9	103.8			97.3	102.6	100	101.1	104.4			109.6	104.2	103.4	111	105.6			105.9	105	100.5	104.2	102.9
