# Supplementary material for: Immunocompetent mouse model for Crimean-Congo hemorrhagic fever virus
Source: eLife. 2021 Jan 8;10:e63906. doi: 10.7554/eLife.63906 (PMC7811403; doi:10.7554/eLife.63906)
Supplement: Figure 2—source data 1. [file elife-63906-fig2-data1.xlsx]

## Sheet: Sheet1
Figure 2A
DPI	Male							Female
0	100	100	100	100	100			100	100	100	100	100
1	98.3	98.4	96.1	97.4	98.1			97.1	94.3	97.3	100.6	97.6
2	99.6	99.6	97.3	99.6	98.9			95.9	97.4	99.5	101.1	96.6
3	94.8	95.9	95.3	95.3	95.9			92.4	98.4	97.9	98.9	96.1
4	91.8	92.7	91.5	91.8	93.7			91.8	93.8	94.7	95.6	95.7
5	86.2	91.4	89.9	90.1	89.6			91.8	91.7	93.6	93.9	96.6
6	82.8	91.4	87.2	89.7	85.9			96.5	100.5	98.9	102.2	96.6
7	84.1	95.5	94.2	97	92.2			95.3	102.1	101.6	105	96.6
8	90.9	98.8	99.2	98.7	98.1			96.5	102.1	103.2	105	99.5
9	94.8	99.2	100	97.9	97.8			95.9	104.2	100.5	106.6	98.1
10	95.3	97.6	98.8	97	97.4			95.3	102.1	101.1	101.7	100.5
11	100.4	98.8	101.9	101.3	100.7			96.5	103.6	97.9	102.2	100.5
12	99.6	100	100.4	98.3	98.1			98.2	102.6	97.9	99.4	98.6
13	99.6	98.4	101.6	100	98.1			94.7	100.5	99.5	100.6	97.1
14	100.4	100	101.6	99.6	98.5			98.8	102.6	101.1	105	99.5
Figure 2B
DPI	Male					Female
0	100	100	100	100	100	100	100	100	100	100
1	94.8	100	97.4	97.7	97.4	93.4	95	99.5	98.4	93
2	94.8	98.2	97	97.7	96.9	91.8	96.5	98.4	98.4	96.5
3	95.7	98.2	96.3	96.3	98.5	94.5	97.5	102.7	97.3	96
4	97	98.2	98.5	98.1	96.9	93.4	96.5	101.6	99.5	95
5	97.4	97.3	98.5	97.7	98.5	94	100.5	103.7	100	98.5
6	100	99.1	102.6	91.2	100	103.3	101.5	105.9	101.1	98.5
7	99.1	99.6	101.1	100	102	96.7	100	104.3	103.2	99
8	99.6	101.3	100.7	100.9	99.5	98.4	100	104.8	102.7	101
9	94.4	98.7	98.9	99.1	98.5	92.3	95	101.1	100.5	95.5
10	90.5	96.4	96.3	97.7	96.9	92.3	98	98.4	97.9	98.5
11	94.8	103.1	104.1	104.2	107.7	98.4	101	108	108	102
12	93.5	100	101.5	100	102	95.6	97	108	107.5	96
13	95.3	97.3	100	103.3	99.5	96.7	105	106.9	104.8	101
14	90.5	96.9	98.9	104.2	100	95.1	104	108	107	100.5
Figure 2C
DPI	Male					Female
0	100	100	100	100	100	100	100	100	100	100
1	97.6	98.1	97.3	95.7	98.1	101	95.3	100	101	98.5
2	99.6	97.4	96.9	96.5	95.8	100	93.8	100	100.5	98.5
3	95.5	96.6	96	96.5	97.3	97.4	89.6	95.6	100	97.1
4	93.1	92.5	93.8	93	93.9	96.9	90.1	97.8	100	95.6
5	89.9	87.6	90.3	91.3	93.1	97.9	92.2	99.5	102.9	98.5
6	87.4	85.3	88.5	90.9	90.4	103.1	92.2	103.3	106.3	100.5
7	96	94.7	93.8	97	96.2	99.5	96.9	101.6	104.8	100.5
8	97.2	91.4	93.8	95.7	96.6	100.5	93.2	102.2	103.4	102.4
9	98.8	95.5	97.8	97	97.3	101	94.8	101.6	98.6	107.3
10	98.4	96.6	100.4	97.8	99.2	97.9	93.8	97.3	98.1	105.3
11	95.1	94.4	102.2	107.4	100.8	101	96.9	100.5	101.4	104.9
12	94.7	101.9	112.4	101.3	101.9	100.5	96.9	100.5	101.4	105.3
13	93.1	101.1	113.3	101.7	102.7	102.1	98.4	104.9	108.2	102.4
14	93.1	102.3	112.8	101.7	103.1	104.2	97.4	104.4	107.2	101.9
Figure 2D
DPI	Male					Female
0	100	100	100	100	100	100	100	100	100	100
1	98.9	99.1	99.1	99.5	97.1	98.9	97.9	101.7	103.4	97.9
2	98.4	100	100.9	99.1	97.6	101.1	99.5	98.9	105.7	100
3	96.8	97.4	99.5	98.1	95.7	100.5	98.4	100.6	104	101.5
4	96.3	93.6	97.2	94.9	93.8	98.9	98.9	100.6	101.7	97.9
5	90.5	89.7	89.9	90.3	87.6	93	96.3	95	98.3	95.9
6	94.7	87.6	85.7	89.4	85.6	101.6	104.8	100.6	110.3	101
7	102.1	94.4	86.2	93.5	90.9	105.4	107	105.5	110.9	103.1
8	102.1	96.1	90.3	99.1	99.5	103.2	105.9	101.7	110.3	102.6
9	100.5	85.8	94.5	99.1	101.9	103.8	105.3	100.6	113.8	99.5
10	100	90.6	102.8	96.8	102.9	102.2	102.7	99.4	106.9	97.9
11	103.2	99.6	101.4	100.5	106.7	103.2	107	106.6	116.1	104.1
12	104.7	98.3	98.6	100.5	110	102.7	107	104.4	113.8	99.5
13	104.2	92.7	99.5	99.1	103.8	103.2	104.8	112.2	116.7	100.5
14	103.7	93.1	100.5	102.3	110	104.3	105.3	105	108	105.2
Figure 2E
DPI	Male					Female
0	100	100	100	100	100	100	100	100	100	100
1	97.3	98.4	97.4	98.8	99.4	98.7	95.7	101.1	100.9	99.6
2	99.2	95.5	98.8	99.4	100.6	96.7	95.1	104.1	99.7	104.4
3	94.8	94.7	99.1	97	96.5	95.3	95.1	100	97.8	100
4	95.1	93.6	95.7	96.4	93.9	98.7	94.4	102.2	100	103.7
5	88.3	84.9	90.1	92	90	100	93.4	98.1	98.8	100
6	95.7	82.8	88.4	96.4	96.5	102	99.7	108.9	103.7	104.8
7	103.5	95	99.4	105.1	103.9	107	110.2	114.1	104.7	108.9
8	103.3	98.4	102	105.1	102.9	105	106.3	104.5	99.1	107.4
9	104.3	92.6	101.2	101.5	101.3	106	113.2	103	97.2	105.2
10	100.8	97.6	99.4	97.6	101.6	102.7	90.5	116.7	100.6	107.4
11	103.3	101.3	101.4	102.1	105.8	107	97.4	120.4	106.9	110.7
12	102.2	102.4	101.2	103.3	102.9	107	94.4	111.2	102.2	112.5
13	103	101.1	104.1	103.3	102.3	107.7	94.1	106.7	102.8	113.7
14	102.2	101.9	106.1	102.4	104.5	109.4	94.7	121.6	103.7	112.5
