# Supplementary material for: Immunocompetent mouse model for Crimean-Congo hemorrhagic fever virus
Source: eLife. 2021 Jan 8;10:e63906. doi: 10.7554/eLife.63906 (PMC7811403; doi:10.7554/eLife.63906)
Supplement: Figure 3—source data 1. [file elife-63906-fig3-data1.xlsx]

## Sheet: Sheet1
Figure 3A
DPI	Hoti ♂								Hoti ♀								MA-CCHFV ♂								MA-CCHFV ♀
1	99462516	166000000	170000000	224000000					578000000	574000000	468000000	91149368					35666954	32858181	188000000	62604330	16063822	1879826	3161420	8508855	304000000	24860261	66724306	133000000	6933543	3961781	530223	6206850
3	53289433	5767704	48962910	6539017					16736922	16407735							25400000000		3080000000	10800836	89057801	437000000	236000000	310000000	41431459	1610000000	351000000	1350000000	19922792	11645035	18699242	1109160
6	60000	128740	3243648	3126055					4351895	3693164	3132479	60000					1480000000	966000000	3230000000	1270000000	78951444	65267267	281000000		14620192	16235230	60000	10449070	205799	70406	2083154	726028
8	481644	93671.4	9348.39	752698					60000	60000	58295.8	525434					17192964		13987921	12987714	2380770	707533	559806		205478	60000	115428	344854	60000	28130.7	225557	60000
14	60000	60000	60000	10061.9					60000	60000	60000	60000					91639.4	60000	61110	953799	60000	60000	266839	60000	60000	60000	60000	60000	60000	60000	60000	281225
Figure 3B
DPI	Hoti ♂								Hoti ♀								MA-CCHFV ♂								MA-CCHFV ♀
1	174155	198374	498278	565390					261617	482393	746366	307890					556941	400187	314913	381463	1311855	1149428	889856	7696727	862019	596460	865537	980542	2856259	732151	73497.3	2740196
3	172248	554280	376026	328752					249730	313519	527005	87075					17737837	6746959	5653983	19347.2	11097677	14179924	30776463	17009679	2185529	4914182	3031121	8253771	1168023	1587199	4736424	918301
6	3293.03	5427.97	4430.64	1229.2					2916.5	3402.78	3857.74	4866.17					10152563	4658132	14484569	5476981	1699950	4424121	8945858		177732	27475.7	939.57	59934.2	108572	14293.7	8740.12	5953.01
8	2187.21	819.752	1179.79	1699.45					2200.89	2329.62	3087.97	1226.21					284609	5290813	153304	159394	176942	94541.7	202867		8194.25	3969.1	5397.9	4706.18	6727.59	8155.18	5326.46	15704
14	2745.56	320.166	702.668	240.413					555.556	166.998	2088.54	172.066					5411.96	2217.94	3255.46	3428.47	1916.18	2001.81	1034.82	957.799	981.276	1341.44	1817.5	625	244.959	19.6849	346.163	505.151
Figure 3C
DPI	Hoti ♂								Hoti ♀								MA-CCHFV ♂								MA-CCHFV ♀
1	23086.2	21439.9	16436.5	171663					61302.1	5808.1	9508.89	35084.1					37695.7	35738.5	13740.4	30113.7	4655.97	2408.44	1654.26	13484.9	10236.1	14716.4	6211.99	13126.4	5566.1	4479.71	1806.11	110023
3	15413.7	31006.8	24146.2	10396					23745.3	18274.5	38156.9	5291.56					363724	47888.1	21101.8	1575.75	63619.6	56608.3	82512.5	21860.7	25738.1	39299	20179.5	24408.4	20902.5	10866.3	6151.27	3614.8
6	2557.12	1424.81	2124.22	2729.89					896.292	1618.49	2405.75	5312.85					215354	285608	421217	271924	100563	96740.6	134222		50028.4	29389.4	91.6059	45919.6	6353.15	3690.13	7795.31	7145.16
8	1292.45	185.104	333.333	400.374					292.229	333.333	427.68	583.332					14015.7	132219	50068.1	25849.4	29530.8	7253.78	15741.1		4376.72	4016.29	4115.32	4513.97	1634.44	371.971	597.305	1269.53
14	333.333	333.333	91.7264	333.333					333.333	68.35	333.333	333.333					4945.33	8841.88	25281.6	5284	1152.55	732.109	10543.7	1747.42	105.992	1318.14	1568.97	333.333	4410.51	1208.87	1339.49	432.237
Figure 3D
DPI	Hoti ♂								Hoti ♀								MA-CCHFV ♂								MA-CCHFV ♀
1	137653	114635	17171.9	97851.4					318.938	125.793	20809.8	11140.3					41904.8	23751.3	29649.3	33551.7	6712.45	49351.4	8133.51	11146.7	13258.4	12101.7	32211.6	5854.17	12952.6	17566.8	8927.55	81182.8
3	17446.3	196308	41201.8	23761.6					22577.7	31764.5	31473.9	3406.4					1005323	182144	75706.8	3214.12	245175	223283	62961.7	162079	36622.4	43815.9	37728.2	91228.1	70928.4	50082.4	22163.8	19708.9
6	1717.52	1466.22	558.952	3494.07					1505.27	2091.86	6485.84	2617.28					612029	478667	1606274	1478289	93492.1	219786	326650		184603	89282.3	332.063	70471.5	5904.3	5721.74	19822.8	38861.6
8	615.09	52.6316	546.112	724.499					4728.06	76.9231	338.697	971.205					225072	345462	191042	145782	54282.7	35604.1	18603.8		12712.8	34499.5	19420.5	7143.36	30897	2313.44	3068.8	8526.07
14	166.667	58.8235	983.709	285.909					333.333	806.593	250	274.456					565210	1806748	391533	48744.2	10065.9	8703.04	30091.8	13174.8	25	3807.99	33631.1	90.9091	6551.61	33.3333	9421.14	325.844
Figure 3E
DPI	Hoti ♂				Hoti ♀				MA-CCHFV ♂				MA-CCHFV ♀
1	33.3333	33.3333	290.778	118.903	125.782	332.419	151.877	249.261	33.3333	227.816	33.3333	33.3333	33.3333	33.3333	241.738	33.3333
3	33.3333	33.3333	33.3333	33.3333	33.3333	33.3333	33.3333	33.3333	6766.75	4529.78	4779.22	455.881	492.41	1824.81	420.594	2082.58
6	33.3333	240.666	33.3333	33.3333	33.3333	33.3333	33.3333	248.351	24098.2	34706.8	51380	10622.5	1215.26	5532.79	33.3333	2568.97
8	33.3333	33.3333	33.3333	33.3333	33.3333	33.3333	33.3333	33.3333	2741.78	13502.7	1754.05	3787.23	1093.13	431.74	2321.94	430.633
14	33.3333	33.3333	33.3333	33.3333	33.3333	33.3333	33.3333	33.3333	1174.27	1729.72	1100.99	760.853	33.3333	107.697	742.021	33.3333
