# Supplementary material for: Immunocompetent mouse model for Crimean-Congo hemorrhagic fever virus
Source: eLife. 2021 Jan 8;10:e63906. doi: 10.7554/eLife.63906 (PMC7811403; doi:10.7554/eLife.63906)
Supplement: Figure 5—source data 1. [file elife-63906-fig5-data1.xlsx]

## Sheet: Sheet1
IL-1B
DPI	Mock								MA-CCHFV ♂								MA-CCHFV ♀
1	2.4	2.66	2.66	2.91	1.57	1.57			2.91	2.91	2.66	2.66	1.57	1.57	1.57	1.57	2.66	2.91	2.91	2.91	1.57	1.57	1.57	1.57
3	2.91	2.15	2.66	2.66	1.57	1.57			3.96	3.17	2.91		1.57	1.57	1.57	1.57	2.91	3.43		4.8	1.57	1.57	1.57	1.57
6	2.91	2.4	2.53		1.57	1.57			6.96	8.09	14.86	3.96	72.72	24.87	60.41		5.03	10.98	2.66	2.91	1.57	1.57	45.09	26.22
8	2.66	2.66	2.4	2.4	1.57	1.57			25.12	24.8	9.38	49.63	149.69	17.78	118.17		6.68	10.69	12.64	43.5	116.62	7.1	13.48	1.57
14	2.69	2.35	2.69	3.7	1.57	1.57			19.37	30.12	19.75	22.79	1.57	15.63	46.09	1.57	7.56	4.05	6.84	13.75	9.04	1.57	1.57	1.57
IL-5
DPI	Mock								MA-CCHFV ♂								MA-CCHFV ♀
1	1.64	4.66	23.05	3.36	14.6	3.51			13.82	9.45	6.83	4.23	10.31	7.55	10.04	16.44	6.83	6.4	4.88	7.27	8.94	10.04	2.91	15.39
3	5.53	2.5	5.53	4.66	2.29	8.11			13.39	5.1	6.62		14.07	14.6	8.94	11.67	10.54	12.29		8.46	13.8	13.57	12.47	12.47
6	3.8	5.75	9.23	2.5	1	6.42			41.6	35.84	100.84	17.33	646.81	186.91	486.49		27.45	93.68	10.32	16.01	28.14	61.4	475.62	324.83
8	5.96	11.2	3.8	5.31	6.99	17.74			332.96	91.23	78.95	341.9	1026.39	194.72	544.38		17.55	110.92	108.95	238.5	985.41	84.29	158.84	21.52
14	4.44	3.2	11.64	11.05	2.91	1.66			41.88	41.88	56.85	15.16	23.37	141.19	235.48	9.77	36.84	39.08	16.9	8.67	46.83	31.85	12.47	9.22
IL-6
DPI	Mock								MA-CCHFV ♂								MA-CCHFV ♀
1	1.99	3.78	3.2	4.06	64.27	25.39			17.74	15.8	15.13	11.35	57.77	55.27	51.1	37.98	17.89	13.12	20.67	16.39	33.96	72.45	65.58	62.88
3	5.65	3.2	5.65	3.13	21.06	20.83			86.32	29.88	30.34		158.88	113.06	90.62	138.41	28.19	25.29		18.88	57.97	56.24	44.75	45.42
6	5.72	5.79	4.49	4.64	17.67	12.46			22.94	17.89	38.71	23.39	29.4	15.05	26.03		11.94	9.8	5.36	23.69	4.4	4.33	3.27	3.04
8	9.29	5.22	5.5	2.06	26.6	31			20.44	15.8	4.71	13.64	39.5	1.63	12.78		7.54	9.29	13.73	21.85	18.25	2.17		12.56
14	4.99	5.72	13.81	11.32	22.25	11.18			16.15	27.01	16.31	18.66	1.91	10.33	25.09	13.75	10.58	7.2	11.07	13.48	14.9	8.16	14.04	2.42
G-CSF
DPI	Mock								MA-CCHFV ♂								MA-CCHFV ♀
1	82.98	120.57	164.5	124.46	315.02	108.36			258.7	199.99	391.08	325.08	398.68	395.16	360.75	647.12	460.73	391.08	431.98	318.01	670.59	506.3	328.18	1100.97
3	109.92	106.06	125.43	100.27	128.18	136.93			5205.66	1216.58	1605.23		4178.95	6325.46	5249.08	5571.86	753.06	2179.03		1049.46	1119.81	667.02	436.18	416.34
6	144.91	159.59	164.5	106.06	127.66	115.43			806.11	601.68	1380.84	1210	398.98	299.1	457.02		211.88	121.54	182.21	139.06	56.3	45.46	92.4	95.86
8	156.65	98.34	158.61	160.58	170.46	288.92			333.17	151.76	106.06	135.16	139	47.97	78.45		187.14	145.89	232.86	232.86	63.12	81.61	30.95	24.57
14	136.24	96.08	414.41	228.35	159.89	132.8			253.18	452.09	230.6	264.48	90.43	51.19	159.89	114.41	217.08	230.6	196.81	244.14	140.56	7.25	87.47	93.39
KC
DPI	Mock								MA-CCHFV ♂								MA-CCHFV ♀
1	33.11	43.85	42.79	52.25	22.27	11.32			148.54	154.2	114.15	142.39	62.11	62.54	46.43	81.62	161.71	140.96	158.9	183.16	58.28	59.77	20.4	95.02
3	34.2	32.57	50.68	34.2	17.11	18.53			348.27	411.14	638.83		63.6	57.64	50.12	140.93	381.76	587.63		512.64	91.53	42.61	95.22	67.82
6	56.4	34.2	28.73	32.02	14.24	9.33			117.53	130.97	193.35	151.37	43.81	95.43	52.92		50.16	56.4	56.4	49.11	6.8	15.2	32.3	15.44
8	33.11	41.19	30.38	33.11	13.27	12.3			38.52	60.52	72.73	41.19	24.58	9.83	15.68		41.72	29.83	46.14	46.14	19.7	9.58	3.63	0.97
14	50.19	50.19	52.85	60.08	37.21	15.2			63.32	88.34	48.84	44.77	20.4	8.33	105.42	7.31	52.85	36.44	42.03	46.14	4.17	4.17	6.28	7.31
MCP-1
DPI	Mock								MA-CCHFV ♂								MA-CCHFV ♀
1	113.57	104.81	224.04	236.97	234.77	187.98			6857.5	4451.82	4169.86	3207.93	7486.21	1813.22	2882.3	5562.23	8041.25	6911.51	10748.2	10506.4	5090.28	3263.53	356.9	9852.13
3	104.81	42.69	168.84	153.91	101.63	243.71			36074	16392	18499.3		28889	39151.2	30072	32153.7	9441.42	13644		9539.1	6849.21	7273.38	3946.22	3135.34
6	138.36	138.36	153.91	122.06	178.12	216.51			2879.19	1917.67	4732.02	3100.3	1131.79	2137.67	2022.15		565.18	309.42	243.33	375.56	68.86	28.22	119.46	221.12
8	104.81	168.84	183.26	183.26	157.75	299.18			748.32	1481.82	286.11	332.05	479.05	125.19	616.25		197.23	309.42	878.19	1665.49	579.43	295.05	553.31	258.95
14	258.09	236.68	335.25	335.25	147.2	211.85			1996.63	2724.64	1183.7	1537.26	451.01	496.27	725.36	713.37	508.73	450.18	1102.54	1354.24	749.13	327.51	652.3	46.09
MIP1a
DPI	Mock								MA-CCHFV ♂								MA-CCHFV ♀
1	2.47	4.24	2.25	3.35	13.8	2.46			23.72	21.86	21.47	16.92	24.03	14.75	15.85	26.86	31.6	18.54	25.2	30.51	19.35	17.86	14.64	17.51
3	4.84	3.5	4.39	2.98	2.63	4.17			85.92	45.87	42.94		70.76	60.97	50.23	47.42	26.44	44.36		30	17.96	20.11	12.15	6.04
6	4.09	4.09	3.35	3.65	3.18	1.85			121.66	102.3	226.58	140.66	138.42	140.84	157.62		32.39	19.08	4.54	14.61	5.58	4.44	7.44	8.8
8	6.93	3.94	4.99	3.28	7.09	6.77			13.01	78.52	13.77	9.58	6.34	3.29	3.76		9.96	5.96	7.59	6.35	2.46	0.77	0.94	1.89
14	5.37	4.03	9.37	8.66	3.84	1.29			6.88	10.17	5.28	5.9	0.83	0.83	0.36	0.71	6.35	4.21	5.1	4.56	0.53	0.12	0.65	0.6
MIP1b
DPI	Mock								MA-CCHFV ♂								MA-CCHFV ♀
1	44.61	84.58	9.37	96.79	1033.28	398.21			519.61	491.04	435.88	405.02	1001.37	854.84	885.8	1180.87	534.82	445.77	469.12	472.85	1118.38	1042.35	829.7	952.85
3	111.47	75.87	112.66	89.79	372.72	531.61			1420.44	830.71	621.84		2236.64	1806.24	1382.98	1495.73	643.63	503.55		392.24	922.86	1145.62	747.33	666.28
6	117.38	102.99	92.99	115.62	293.11	977.6			715.77	475.09	984.28	683.32	1575.94	1775.87	1202.07		291.41	216.43	104.22	185.7	269.39	236.62	242.06	293.11
8	182.19	110.87	153.67	80.6	529.66	698.71			205.87	635.35	14.53	131.18	346.2	329.69	214.48		239.8	144.5	193.98	185.99	296.54	82.3	724.92	154.58
14	181.66	137.51	216.07	243.38	449.96	224.39			182.21	241.48	184.91	187.07	176.07	232.97	283.92	235.4	152.14	119.32	144.92	115.23	191.69	196.81	239.04	129.44
RANTES
DPI	Mock								MA-CCHFV ♂								MA-CCHFV ♀
1	131.08	139.05	189.88	206.87	309.88	91.53			987.7	749.11	1144.56	830.33	209.54	159.55	339.1	547.22	1389.34	1093.23	941.06	764.63	382.85	387.3	201.71	368.48
3	155.26	167.19	241.38	188.74	107.08	117.35			2133.18	964.36	960.86		793.76	842.28	832.77	736.19	478.82	1008.15		723.42	424.53	473.75	305.81	237.69
6	198.09	209.42	188.18	205.17	110.51	107.94			2215.81	1867.05	3863.5	2187.54	1520.81	688.69	1389.77		738.2	1565.6	183.36	456.44	401.47	93.48	221.48	217.16
8	224.13	199.51	213.1	174.85	188.68	258.56			291.67	2054.72	151	297.32	156.41	96.3	82.15		305.51	377.82	153.91	248.33	88.05	112.65	75.33	215.09
14	221.25	160.2	232.97	230.5	142.77	67.79			215.07	234.2	210.74	198.95	97.16	80.17	125.01	160.39	180.58	167.74	190.24	262.73	94.13	59.29	70.46	74.89
