# Supplementary material for: Immunocompetent mouse model for Crimean-Congo hemorrhagic fever virus
Source: eLife. 2021 Jan 8;10:e63906. doi: 10.7554/eLife.63906 (PMC7811403; doi:10.7554/eLife.63906)
Supplement: Figure 6—source data 1. [file elife-63906-fig6-data1.xlsx]

## Sheet: Sheet1
Figure 6C
DPI	WT ♂					WT ♀					IFNAR-/-♂					IFNAR-/-♀
0	100	100	100	100		100	100	100	100		100	100	100	100	100	100	100	100	100	100
1	94.1	95.3	97.8	95.4		90	89.3	91.7	90.3		94.8	93.6	97.3	98.4	96.4	96.6	91.7	94.1	94	95.6
2	95.8	96.1	95.9	96.2		90.5	95.2	92.7	96.6		86.4	86.9	91.9	91	90.6	84.5	83.3	83.6	84.7	86.3
3	91.6	95.3	95.9	93.9		93.7	97	96.4	99.4				85	84	84.5
4	90	92.6	90.6	87		92.1	96.4	93.8	98.9				83.5	82.1	80.3
5	83.3	89.8	82.8	84		88.4	94.6	93.3	101.1				78.4	77.6	74.8
6	80.8	87.9	81.6	83.6		93.2	96.4	99.5	104.5
7	90	93.8	82	89.3		97.9	106	99.5	104
8	95	100.8	82.8	96.9		96.3	103	102.6	105.7
9	98.7	99.6	94.4	98.5		99.5	100.6	101.6	104
10	99.2	100.4	99.3	98.5		98.9	102.4	102.1	104.5
11	98.7	99.2	100	98.5		96.8	101.2	105.7	113.1
12	99.2	100	100.7	96.6		94.7	101.2	100	104.5
13	97.5	98	100.4	96.9		94.2	98.2	97.9	104
14	99.6	100.8	100	96.6		100	103	102.6	104.5
Figure 6D
DPI	WT ♂	WT ♀	IFNAR-/-♂	IFNAR-/-♀
14	0	0
14	0	0
14	0	0
14	0	0
3				1
3				1
3				1
3				1
3				1
3			1
3			1
6			1
6			1
6			1
