# Supplementary material for: Immunocompetent mouse model for Crimean-Congo hemorrhagic fever virus
Source: eLife. 2021 Jan 8;10:e63906. doi: 10.7554/eLife.63906 (PMC7811403; doi:10.7554/eLife.63906)
Supplement: Figure 7—source data 1. [file elife-63906-fig7-data1.xlsx]

## Sheet: Sheet1
Figure 7A
DPI	Mock ♂♀								MA-CCHFV ♂								MA-CCHFV ♀
3	0.053	0.05	0.049	0.0505	0.049	0.051			0.061	0.0535	0.059	0.0615	0.1115	0.0575	0.124	0.121	0.0585	0.168	0.1635	0.1585	0.1755	0.17	0.105	0.1565
6	0.059	0.05	0.06	0.051	0.0495	0.048			0.6385	0.744	0.733	0.748	2.262	2.5255	2.274		0.6955	0.747	0.1275	0.827	1.7165	1.915	1.821	1.799
8	0.0495	0.065	0.05	0.052	0.115	0.078			0.791	0.943	0.581	0.6925	1.7575	1.8215	1.2135		0.449	0.354	0.342	0.4405	1.2135	1.045	1.5925	1.4005
14	0.065	0.051	0.052	0.052	0.0535	0.0515			0.17	0.1395	0.1835	0.1635	0.3475	0.3815	0.3135	0.455	0.1085	0.106	0.133	0.062	0.4075	0.2265	0.2425	0.2545
Figure 7B
DPI	Mock ♂♀								MA-CCHFV ♂								MA-CCHFV ♀
3	0.0605	0.0515		0.052	0.047	0.048			0.0505	0.0495	0.0565	0.0645	0.047	0.047	0.0795	0.0725	0.052	0.051	0.0505	0.051	0.0535	0.0515	0.051	0.0515
6	0.051	0.0525	0.0525	0.0495	0.0535	0.063			0.397	0.294	0.32	0.3945	1.03	0.817	1.004		0.5865	0.5645	0.195	0.509	1.494	1.542	1.491	1.4285
8	0.049	0.049	0.049	0.049	0.095	0.0925			0.7585	0.4455	0.742	0.6225	1.605	1.7145	1.812		0.8615	0.98	0.877	0.933	1.9245	1.944	1.9375	1.9405
14	0.0785	0.061	0.061	0.06	0.049	0.049			1.192	1.1455	1.107	1.186	2.17	2.1105	2.0645	2.313	1.438	1.4075	1.381	1.2345	2.496	1.9835	2.0375	2.1105
Figure 7D
DPI	WT ♂					WT ♀					Rag1-/- ♂					Rag1-/- ♀
0	100	100	100	100	100	100	100	100	100	100	100	100	100	100	100	100	100	100	100	100
1	97.53	94.47	97.12	96.77	94.8	97.84	98.4	99.41	94.92	96.89	100	98.35	95.38	96.46	99.62	99.36	99.33	98.77	100	101.21
2	97.53	93.62	95.68	94.76	94.4	98.92	100	100.59	96.05	95.85	96.04	96.28	92.31	94.88	95.4	101.28	99.33	100	100	100.61
3	93	93.19	93.53	92.34	91.2	96.76	100	98.82	93.22	94.3	92.07	95.04	89.23	92.91	91.19	104.49	98.67	99.38	100.71	98.18
4	89.71	88.94	88.13	89.11	88	97.84	101.6	95.29	90.96	89.64	86.78	92.15	84.62	89.76	85.06	100.64	93.33	91.98	98.57	96.36
5	84.36	86.38	83.81	83.06	82.4	96.76	102.66	100.59	90.96	83.42	80.18	86.78	80	82.68	78.93	96.15	84	83.95	94.29	84.85
6	81.48	88.09	81.65	81.05	81.6	100	106.38	104.12	97.74	86.53	75.33	80.58	77.69	78.35	78.16	90.38		80.25	84.29	76.97
7	87.24	94.89	87.05	80.65	85.2	101.08	107.98	105.88	98.31	91.71		78.1		77.17	77.01	82.69
8	93.42	94.47	92.45	90.73	94.8	102.16	105.85	107.65	97.18	97.41		77.27		75.2	78.54	76.92
9	99.18	97.45	96.04	97.18	98	103.78	107.45	104.12	100.56	101.55					76.63
10	97.94	98.3	98.2	97.98	98	99.46	104.26	107.06	97.74	101.04					74.71
11	100	102.13	99.64	98.79	100.8	101.62	104.79	108.24	98.31	101.04
12	99.59	98.72	97.48	95.56	98	103.24	106.38	109.41	95.48	101.04
13	102.88	100	99.28	97.18	100.4	103.78	106.91	106.47	97.18	103.11
14	100.41	99.15	98.56	95.97	97.2	103.78	107.98	105.88	93.79	100
Figure 7E
DPI	WT ♂	WT ♀	Rag1-/-♂	Rag1-/-♀
14	0	0
14	0	0
14	0	0
14	0	0
14	0	0
7			1
9			1
7			1
9			1
10			1
9				1
6				1
7				1
7				1
7				1
