# Supplementary material for: Immunocompetent mouse model for Crimean-Congo hemorrhagic fever virus
Source: eLife journal article supplement (doi:10.7554/elife.63906), 2021-01-08

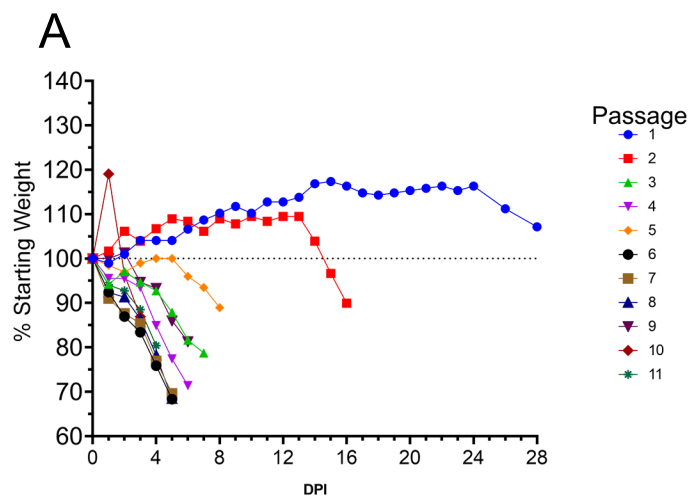

**B**

| Passage            | Source of Inoculating Virus | DPI Sample Collected |
|--------------------|-----------------------------|----------------------|
| 1                  | Hoti Stock                  | 28                   |
| 2                  | P1 Blood                    | 16                   |
| 3                  | P2 Liver                    | 7                    |
| 4                  | P3 Liver                    | 6                    |
| 5                  | P4 Liver                    | 8                    |
| 6                  | P5 Liver                    | 5                    |
| 7                  | P6 Liver                    | 5                    |
| 8                  | P7 Liver                    | 5                    |
| 9                  | P8 Liver                    | 6                    |
| 10                 | P9 Liver                    | 3                    |
| 11                 | P10 Liver                   | 4                    |
| Total time in mice |                             | 13.3 weeks           |

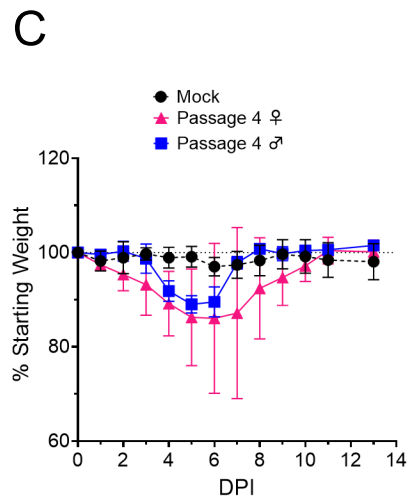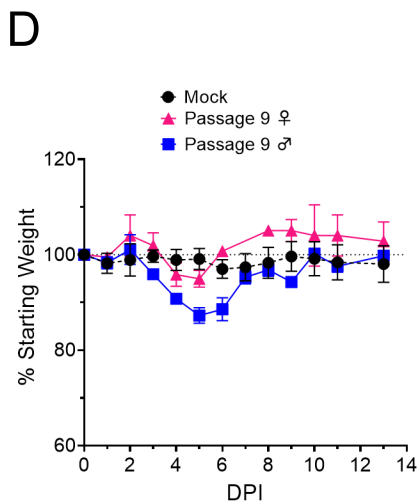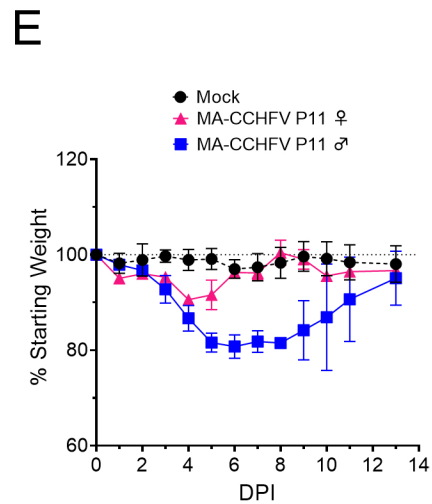

Supplement: supp [file elife_poa_e63906_Figure_1_figure_supplement_1.pdf › elife_poa_e63906_Figure_1_figure_supplement_1.pdf]
