# Supplementary material for: Immunocompetent mouse model for Crimean-Congo hemorrhagic fever virus
Source: eLife. 2021 Jan 8;10:e63906. doi: 10.7554/eLife.63906 (PMC7811403; doi:10.7554/eLife.63906)
Supplement: Supplementary file 1. [file elife-63906-supp1.xlsx]

## Sheet: MS-20-039
			PO#: PGI2031989
					LIVER
									SPLEEN
																KIDNEY
																			LUNG
																							BRAIN
Infection	Gender	Time Point	Specimen No.	Accession No.	Hepatitis, subacute	Vacuolar Degeneration	Extramudullary hematopoesis	Hepatocellular Necrosis with acute inflammation	Extramedullary Hematopoeisis	Follicular Atrophy	Lymphoid Proliferation, Non-Follicular	Lymphoid Proliferation, Follicular	Follicular necrosis	Red Pulp Necrosis	Reticuloendothelial Proliferation	Interstitial nephritis, subacute	Proteinosis	Interstitial fibrosis	No lesions				No lesions				Comments	Severity: 0 = normal, 1 = 0-15%, 2 = 10-25%, 3 = 25-50%, 4 = 50-75%%, 5 = 75-100%. Inflammation 0 = none, 1 = minimal, 2 = mild, 3 = moderate, 4 = marked, 5 = severe
Mock	M	1 DPI	M001	MS-20-039	0	0	0	1	0	0	0	0	0	0	0	0	0	0
			M002	MS-20-039	0	0	0	1	0	0	0	0	0	0	0	0	0	0
	F		M003	MS-20-039	0	0	0	0	0	0	0	0	0	0	0	0	0	0
			M004	MS-20-039	0	0	0	0	0	0	0	0	0	0	0	0	0	0
Hoti	M		M005	MS-20-039	0	0	1	0	0	0	0	0	0	0	0	0	0	0
			M006	MS-20-039	1	0	1	1	0	0	0	0	0	0	0	0	0	0
			M007	MS-20-039	1	0	1	1	0	0	0	0	0	0	0	0	0	0
			M008	MS-20-039	1	0	0	1	1	0	0	1	0	0	0	0	0	0
	F		M009	MS-20-039	1	0	1	1	0	0	0	0	0	0	0	0	0	0
			M010	MS-20-039	1	0	0	1	0	0	0	0	0	0	0	0	0	0
			M011	MS-20-039	1	0	0	2	0	0	0	0	0	0	0	0	0	0
			M012	MS-20-039	1	0	0	2	0	0	0	0	0	0	0	0	0	0
MA-CCHF	M		M013	MS-20-039	1	0	1	1	0	0	0	0	0	0	0	0	0	0
			M014	MS-20-039	1	1	0	1	0	0	0	0	0	0	0	0	0	0
			M015	MS-20-039	1	0	1	1	0	0	0	0	0	0	0	0	0	0
			M016	MS-20-039	1	0	0	2	0	0	0	0	0	0	0	0	0	0
	F		M017	MS-20-039	1	0	0	2	0	0	0	0	0	0	0	0	0	0
			M018	MS-20-039	1	0	0	1	0	0	0	0	0	0	0	0	0	0
			M019	MS-20-039	1	0	0	1	0	0	0	0	0	0	0	0	0	0
			M020	MS-20-039	1	0	1	1	0	0	0	0	0	0	0	0	0	0
Mock	M	3 DPI	M021	MS-20-039	0	1	0	0	0	0	0	0	0	0	0	0	0	0
			M022	MS-20-039	0	2	0	0	0	0	2	0	0	0	0	0	0	0
	F		M023	MS-20-039	1	1	1	1	0	0	0	0	0	0	0	0	0	0
			M024	MS-20-039	0	1	1	0	0	0	0	0	0	0	0	0	0	0
Hoti	M		M025	MS-20-039	0	2	1	0	1	0	0	0	0	0	0	0	0	0
			M026	MS-20-039	1	1	0	0	0	0	0	0	0	0	0	0	0	0
			M027	MS-20-039	1	1	0	1	0	0	0	0	0	0	0	0	0	0
			M028	MS-20-039	0	2	0	0	0	0	0	0	0	0	0	0	0	0
	F		M029	MS-20-039	0	2	1	0	0	0	0	0	0	0	0	0	0	0
			M030	MS-20-039	1	2	0	1	0	0	0	0	0	0	0	0	0	0
			M031	MS-20-039	0	1	1	0	0	0	0	0	0	0	0	0	0	0
			M032	MS-20-039	1	0	0	1	0	0	0	0	0	0	0	0	0	0
MA-CCHF	M		M033	MS-20-039	2	0	0	3	1	0	0	0	0	1	0	0	0	0
			M034	MS-20-039	2	0	0	3	0	0	0	0	0	0	0	0	0	0
			M035	MS-20-039	2	0	0	3	1	0	0	0	0	0	0	0	0	0
			M036	MS-20-039	1	1	0	1	0	0	0	0	0	0	0	0	0	0
	F		M037	MS-20-039	2	0	0	3	1	0	0	0	0	0	1	0	0	0
			M038	MS-20-039	2	0	0	3	1	0	0	0	0	0	0	0	0	0
			M039	MS-20-039	2	0	0	3	0	0	0	0	0	0	0	0	0	0
			M040	MS-20-039	2	0	0	3	1	0	0	0	0	0	0	0	0	0
Mock	M	6 DPI	M041	MS-20-039	0	1	0	0	0	0	1	0	0	0	1	0	0	0
			M042	MS-20-039	0	1	0	0	0	0	1	0	0	0	1	0	0	0
	F		M043	MS-20-039	1	1	0	1	0	0	1	0	0	0	1	0	0	0
			M044	MS-20-039	1	1	0	1	0	0	1	0	0	0	1	0	0	0
Hoti	M		M045	MS-20-039	1	1	1	0	0	0	1	0	0	0	0	0	0	0
			M046	MS-20-039	1	1	0	1	0	0	1	1	0	0	0	1	0	0									Kidney lesion interpreted as background and not related to study
			M047	MS-20-039	1	1	0	0	0	0	1	1	0	0	0	0	1	0									Kidney lesion interpreted as background and not related to study
			M048	MS-20-039	1	1	0	1	0	0	1	1	0	0	0	0	0	0
	F		M049	MS-20-039	1	1	1	0	0	0	1	1	0	0	1	0	0	0
			M050	MS-20-039	1	1	0	0	0	0	1	0	0	0	0	0	0	0
			M051	MS-20-039	1	1	1	0	0	0	1	0	0	0	0	0	0	0
			M052	MS-20-039	1	1	1	0	0	0	1	0	0	0	0												No kidney present on slide
MA-CCHF	M		M053	MS-20-039	1	3	0	4	0	2	0	0	2	2	0	0	0	0
			M054	MS-20-039	2	2	0	3	0	0	0	1	1	2	0	1	0	1									Kidney lesion interpreted as background and not related to study
			M055	MS-20-039	1	3	0	4	0	0	0	1	2	1	0	0	0	0
			M056	MS-20-039	1	2	0	4	0	0	1	0	1	2	0	0	0	0
	F		M057	MS-20-039	2	3	0	1	1	0	1	0	1	2	0	0	0	0
			M058	MS-20-039	2	2	0	1	0	0	1	0	1	2	0	0	0	0
			M059	MS-20-039	1	1	0	1	0	1	1	0	0	0	0	0	0	0
			M060	MS-20-039	2	2	0	2	0	0	1	0	1	1	0	0	0	0
Mock	M	8 DPI	M061	MS-20-039	1	1	0	0	1	0	1	0	0	0	1	0	0	0
			M062	MS-20-039	1	1	0	0	0	0	0	0	0	0	1	0	0	0
	F		M063	MS-20-039	1	1	1	0	0	0	0	0	0	0	0	0	0	0
			M064	MS-20-039	0	1	1	0	0	0	0	0	0	0	0	0	0	0
Hoti	M		M065	MS-20-039	0	1	1	0	0	0	0	0	0	0	1	0	0	0
			M066	MS-20-039	1	1	1	1	0	0	0	1	0	0	0	0	0	0
			M067	MS-20-039	0	1	0	0	0	0	0	1	0	0	0	0	0	0
			M068	MS-20-039	1	1	0	0	0	0	0	1	0	0	0	0	1	0									Kidney lesion interpreted as background and not related to study
	F		M069	MS-20-039	1	0	0	1	0	0	0	1	0	0	0	0	0	0
			M070	MS-20-039	1	1	0	1	0	0	1	1	0	0	1	0	0	0
			M071	MS-20-039	1	0	1	0	0	0	0	0	0	0	0	0	0	0
			M072	MS-20-039	1	1	0	1	0	0	0	0	0	0	1	0	0	0
MA-CCHF	M		M073	MS-20-039	2	3	0	2	0	0	1	0	0	0	1	0	0	0
			M074	MS-20-039	2	1	0	3	0	0	0	0	2	1	0	0	0	0
			M075	MS-20-039	3	2	0	3	0	0	0	1	0	0	0	0	0	0
			M076	MS-20-039	3	2	0	3	0	0	0	0	1	0	1	0	0	0
	F		M077	MS-20-039	1	2	0	1	0	0	0	0	0	0	2	0	1	0									Kidney lesion interpreted as background and not related to study
			M078	MS-20-039	1	1	0	0	0	0	1	1	0	0	1	0	1	0									Kidney lesion interpreted as background and not related to study
			M079	MS-20-039	1	1	0	0	0	0	1	0	0	0	1	0	1	0									Kidney lesion interpreted as background and not related to study
			M080	MS-20-039	1	1	0	0	0	0	0	0	0	0	0	0	0	0
Mock	M	14 DPI	M081	MS-20-039	1	1	0	0	0	0	0	1	0	0	2	0	0	0
			M082	MS-20-039	1	1	0	0	0	0	0	1	0	0	1	0	0	0
	F		M083	MS-20-039	1	1	0	0	0	0	1	0	0	0	1	0	0	0
			M084	MS-20-039	1	0	0	1	0	0	0	1	0	0	0	0	0	0
Hoti	M		M085	MS-20-039	0	1	0	0	0	0	1	1	0	0	0	0	0	0
			M086	MS-20-039	0	0	0	0	0	0	0	1	0	0	0	0	0	0
			M087	MS-20-039	0	1	1	0	0	0	0	1	0	0	2	1	1	0									Kidney lesion interpreted as background and not related to study
			M088	MS-20-039	1	0	1	1	0	0	0	2	0	0	0	0	0	0
	F		M089	MS-20-039	1	0	1	0	0	0	1	1	0	0	0	0	0	0
			M090	MS-20-039	1	0	1	0	0	0	0	1	0	0	0	0	0	0
			M091	MS-20-039	1	1	1	0	0	0	0	1	0	0	0	0	0	0
			M092	MS-20-039	1	1	1	0	0	0	0	1	0	0	1	0	0	0
MA-CCHF	M		M093	MS-20-039	1	1	1	0	0	0	1	1	0	0	0	1	0	0									Kidney lesion interpreted as background and not related to study
			M094	MS-20-039	1	1	1	0	1	0	1	1	0	0	0	0	0	0
			M095	MS-20-039	0	1	2	0	2	0	2	1	0	0	1	0	0	0
			M096	MS-20-039	1	1	1	0	1	0	2	1	0	0	1	0	0	0
	F		M097	MS-20-039	1	1	1	0	0	0	0	1	0	0	0	0	0	0
			M098	MS-20-039	1	1	1	0	0	0	1	1	0	0	0	0	0	0
			M099	MS-20-039	1	1	1	0	1	0	0	1	0	0	0	0	0	0
			M100	MS-20-039	0	0	1	0	0	0	0	0	0	0	0	0	0	0

## Sheet: IHC
Infection	Gender	Time Point	Specimen No.	liver: endothelial cells/kupffer cells/hepatocytes	0=no signal
Mock	M	1 DPI	M001	0	1=less than 25 %
			M002	0	2=25-50%
	F		M003	0	3=50-75%
			M004	0	4=greater than 75%
Hoti	M		M005	1
			M006	1
			M007	1
			M008	1
	F		M009	1
			M010	1
			M011	1
			M012	1
MA-CCHF	M		M013	1
			M014	1
			M015	1
			M016	1
	F		M017	1
			M018	1
			M019	1
			M020	1
Mock	M	3 DPI	M021	0
			M022	0
	F		M023	0
			M024	0
Hoti	M		M025	1
			M026	1
			M027	1
			M028	1
	F		M029	1
			M030	1
			M031	1
			M032	rare
MA-CCHF	M		M033	2
			M034	2
			M035	2
			M036	rare
	F		M037	2
			M038	2
			M039	2
			M040	0
Mock	M	6 DPI	M041	0
			M042	0
	F		M043	0
			M044	rare
Hoti	M		M045	0
			M046	rare
			M047	rare
			M048	rare
	F		M049	rare
			M050	rare
			M051	rare
			M052	2
MA-CCHF	M		M053	2
			M054	2
			M055	2
			M056	2
	F		M057	1
			M058	1
			M059	0
			M060	1
Mock	M	8 DPI	M061	0
			M062	0
	F		M063	0
			M064	0
Hoti	M		M065	0
			M066	0
			M067	0
			M068	0
	F		M069	0
			M070	0
			M071	0
			M072	0
MA-CCHF	M		M073	rare
			M074	2
			M075	1
			M076	rare
	F		M077	rare
			M078	rare
			M079	1
			M080	rare
Mock	M	14 DPI	M081	0
			M082	0
	F		M083	0
			M084	0
Hoti	M		M085	0
			M086	0
			M087	0
			M088	0
	F		M089	0
			M090	0
			M091	0
			M092	0
MA-CCHF	M		M093	0
			M094	0
			M095	0
			M096	0
	F		M097	0
			M098	0
			M099	0
			M100	0
