# Supplementary material for: Immunocompetent mouse model for Crimean-Congo hemorrhagic fever virus
Source: eLife. 2021 Jan 8;10:e63906. doi: 10.7554/eLife.63906 (PMC7811403; doi:10.7554/eLife.63906)
Supplement: Supplementary file 2. [file elife-63906-supp2.xlsx]

## Sheet: VetScan
	Animal ID	DPI	Group	BUN (mg/dL)	Creatinine (mg/dL)	ALT (U/L)	ALP (U/L)	AST (U/L)	T Bilirubin (mg/dL)	Glucose (mg/dL)	Calcium (mg/dL)	T Protein (g/dL)	Albumin (g/dL)	Glob (g/dL)	Na+ (mmol/L)	K+ (mmol/L)	CL- (mmol/L)	tC02 (mmol/L)	Hem	Lip	Ict	Notes
	1	1	Mock Male	16	<0.2	28	132	85	0.4	165	9.9	4.4	4.1	0.3	144	5.6	108	23	2	0	0
	2			19	0.3	36	93	204	0.3	357	10.3	4.5	3.6	0.9	144	4.9	106	19	2	0	0
	3			27	<0.2	38	93	421	0.2	212	9.4	4.6	3.8	0.8	146	5.7	114	16	3	0	0
	4		Mock Female	21	0.3	37	150	187	0.4	272	10.5	4.5	3.8	0.7	145	4	112	15	0	0	0
	5			22	0.6	39	172	93	0.3	251	10.2	4.5	4.1	0.4	147	4.5	107	18	1	0	0
	6			21	0.4	44	85	126	0.3	272	10	4.7	3.9	0.8	148	4.5	117	14	2	0	0
	7		Hoti Male	20	0.4	55	84	84	0.3	215	10.2	4.7	3.7	1	146	5.3	106	26	2	0	0
	8			20	<0.2	146	84	184	0.3	281	10.3	4.8	3.8	1	146	3.9	107	21	0	0	0
	9			23	0.5	100	95	125	0.3	286	10.4	4.7	3.7	1	144	4.6	111	16	0	0	0
	10			22	0.5	261	79	332	0.2	242	10.5	5	3.8	1.1	146	5.4	105	19	1	0	0
	11		Hoti Female	21	0.4	246	130	474	0.3	131	10.1	4.6	3.7	0.9	146	5.1	110	17	1	0	0
	12			22	0.2	434	100	523	0.2	128	10.6	4.6	3.8	0.7	145	5.3	111	16	2	0	0
	13			25	0.4	336	112	516	0.3	108	10.5	4.7	3.9	0.8	151	5.1	112	19	0	0	0
	14			26	0.2	200	112	298	0.3	156	10.3	4.7	4	0.7	145	4	109	20	0	0	0
	15		MACCHF Male	20	<0.2	108	114	140	0.3	231	9.9	4.6	3.6	1	147	5.6	107	25	0	0	0
	16			24	0.5	79	118	115	0.2	312	9.9	4.6	3.5	1	144	5	106	22	0	0	0
	17			23	<0.2	84	101	156	0.3	314	10.2	4.6	3.6	1	143	4.9	102	17	2	0	0
	18			22	0.3	168	94	248	0.3	246	10.6	4.9	4	0.9	146	5.5	109	19	0	0	0
	19			27	<0.2	239	80	610	0.2	168	9.4	4.7	3.8	0.9	145	6.7	113	21	3	0	0
	20			27	0.4	72	95	136	0.2	263	9.4	4.7	3.6	1.2	146	4.7	112	16	2	0	0
	21			27	<0.2	94	99	334	0.2	251	9.9	4.6	3.6	1.1	144	4.5	110	17	2	0	0
	22			17	0.2	639	193	1062	0.3	99	9.8	4.3	3.6	0.7	147	4.7	116	18	2	0	0
	23		MACCHF Female	20	0.3	434	61	926	0.4	184	10.1	4.8	4.2	0.6	145	6.3	107	22	2	0	0
	24			20	0.2	276	101	425	0.3	261	9.9	4.9	4.1	0.8	143	4.3	109	19	1	0	0
	25			23	0.4	431	138	578	0.3	223	10	4.6	4.2	0.5	146	4.6	108	17	0	0	0
	26			19	0.5	336	111	525	0.3	161	10	4.5	3.8	0.7	147	5.5	113	16	1	0	0
	27			19	0.2	333	61	425	0.2	192	9.6	4.7	4	0.7	145	5.6	114	14	3	0	0
	28			20	<0.2	181	79	249	<0.1	202	10.1	4.9	3.9	1	147	3.9	118	11	2	0	0
	29			26	<0.2	44	53	373	0.2	197	10.2	4.4	4.1	0.3	147	HEM	113	12	3	1	0
	30			22	0.2	384	104	645	0.2	113	10	4.6	3.8	0.7	148	4.6	114	12	2	0	0
	31	3	Mock Male	19	0.4	24	143	106	0.5	177	10.2	4.5	4	0.5	145	4.8	109	23	1	0	0
	32			23	<0.2	32	97	156	0.3	311	10.3	4.6	3.9	0.7	143	5	104	20	2	0	0
	33			23	<0.2	34	91	232	0.2	202	9.7	5	4.1	0.9	148	5.9	113	19	2	0	0
	34		Mock Female	24	<0.2	49	159	435	0.2	228	9.5	4.5	4	0.4	143	5.9	107	19	2	0	0
	35			23	0.2	160	129	418	0.3	305	9.4	4.4	4	0.4	141	4.3	109	15	2	0	0
	36			24	0.2	28	77	134	0.2	309	10.1	4.8	4.2	0.6	146	4.5	112	17	3	0	0
	37		Hoti Male	20	0.2	54	105	147	0.3	234	10.1	4.1	3	1.1	143	5	107	24	0	0	0
	38			20	0.4	41	98	91	0.2	287	10.8	4.5	3.6	0.9	144	4.7	104	22	2	0	0
	39			21	0.2	58	83	117	0.3	297	9.9	4.1	2.8	1.2	146	5.1	107	21	0	0	0
	40			24	0.3	46	113	82	0.2	284	10.9	4.5	3.5	1	146	4.8	108	22	0	0	0
	41		Hoti Female	16	0.4	82	77	469	0.2	188	9.6	4.4	3.7	0.7	147	6.7	107	18	3	0	0
	42			16	0.2	48	88	151	0.3	277	10.5	4.5	3.7	0.8	145	4	110	20	0	0	0
	43			20	<0.2	80	85	417	0.3	229	9.9	4.6	3.6	1	147	4.6	112	12	2	1	0
	44		MACCHF Male	23	0.2	1692	22	2289	0.2	133	9.8	3.8	3.2	0	147	9.8	107	19	3	0	0
	45			18	0.3	570	83	607	0.3	221	10.1	4.6	3.6	1	146	4.5	107	20	1	0	0
	46			22	0.4	597	90	728	0.3	148	10.5	4.3	3.2	1.1	142	5	106	18	2	0	0
	47			22	0.3	38	131	82	0.2	295	10.5	4.6	3.6	1	145	4.9	108	21	0	0	0
	48			24	<0.2	1041	58	1451	0.2	130	9.3	3.9	3.1	0.9	145	6.7	113	20	3	0	0
	49			27	0.4	1270	62	1998	0.2	148	9.6	4.3	3.2	1.1	144	5.8	112	14	3	0	0
	50			27	0.3	917	70	1480	0.2	130	9.7	4	3	1.1	144	5.7	112	14	3	0	0
	51			29	0.4	1197	89	1532	0.3	153	9.7	4.4	3.2	1.2	147	5.5	115	17	2	0	0
	52		MACCHF Female	16	0.4	278	115	327	0.3	164	9.4	4.1	3.5	0.6	146	5	108	24	0	0	0
	53			17	<0.2	795	61	1553	0.5	186	10.1	4	3.4	0.6	145	6.3	106	14	3	0	0
	54			14	<0.2	435	89	1112	0.3	179	10.3	4.2	3.7	0.5	143	HEM	111	10	3	0	0
	55			19	<0.2	502	38	1579	0.5	147	10.7	4.1	3.6	0.5	147	HEM	109	10	3	0	0
	56			22	<0.2	329	72	431	0.2	132	10.5	4.4	3.5	0.8	148	4.2	114	14	2	0	0
	57			11	0.4	186	18	417	0.2	115	<4.0	<2.0	<1.0	~~~	144	6	128	6	2	0	0	1:2 dilution
	58			23	0.2	282	72	492	0.2	128	10.2	4.2	3.4	0.8	146	5.4	113	15	2	0	0
	59			22	0.3	148	75	234	0.2	107	10.2	4.3	3.6	0.8	149	4.7	113	17	2	0	0
	60	6	Mock Male	31	0.3	35	88	146	0.2	287	9.8	4.4	3.6	0.8	145	5.5	107	24	2	0	0
	61			24	<0.2	41	62	124	0.2	295	10.5	4.6	3.9	0.7	146	4.4	110	20	2	0	0
	62			26	0.3	29	107	84	0.3	266	9.9	5	4	0.9	147	5.5	115	21	2	0	0
	63		Mock Female	24	<0.2	34	164	99	0.3	226	9.7	4.8	4	0.8	150	4.8	110	21	0	0	0
	64			26	<0.2	99	98	261	0.4	286	10.1	4.7	4.1	0.6	146	4.1	110	15	2	1	0
	65			22	0.3	33	111	94	0.2	303	9.8	4.3	3.7	0.6	141	4.9	113	15	2	0	0
	66		Hoti Male	28	<0.2	30	109	66	0.3	298	10	4.5	3.4	1.2	143	5	109	17	2	0	0
	67			24	0.3	40	92	76	0.3	319	10.1	4.7	3.6	1.1	146	4.3	111	19	0	0	0
	68			25	<0.2	69	80	636	0.3	325	10.1	4.6	3.9	0.8	149	5.8	109	16	3	0	0
	69			25	<0.2	43	103	161	0.3	310	10.5	4.7	3.6	1.1	147	5.1	108	21	1	0	0
	70		Hoti Female	14	0.2	45	98	190	0.5	169	9.7	4.4	3.5	0.9	148	4.9	113	22	0	0	0
	71			21	<0.2	47	102	103	0.4	277	9.7	4.5	3.8	0.7	147	4.1	113	17	0	0	0
	72			19	0.3	38	83	156	0.3	256	10.3	4.7	3.8	0.9	148	3.8	115	14	0	0	0
	73			22	0.3	31	94	79	0.4	291	10.1	4.6	3.7	0.9	147	3.7	114	14	0	0	0
	74		MACCHF Male	26	0.4	>2000	186	~~ (107)	0.3	65	9.1	3.9	2.1	1.7	149	6.7	114	22	2	0	0
	75			26	0.5	1906	177	>2000	0.3	151	10	3.9	2.2	1.8	146	5.6	112	23	0	0	0
	76			27	0.3	~~~	220	~~~	0.4	71	9.7	4	2.2	1.8	147	5.2	112	22	0	0	0
	77			27	0.2	>2000	213	~~~ (1723)	0.3	108	10.4	4.3	2.5	1.8	148	4.9	112	21	0	0	0
	78			21	<0.2	1259	199	>2000	0.2	164	10.3	4	2.5	1.6	146	7.4	116	23	2	0	0
	79			19	0.2	1690	282	~~~ (1673)	0.2	138	9.5	4.3	2.5	1.8	143	6.7	115	13	2	1	0
	80			22	<0.2	1465	308	~~~ (2054)	0.4	118	10.2	4.1	2.2	1.9	146	6	112	18	2	1	0
	81		MACCHF Female	11	<0.2	623	94	1146	0.3	173	9.9	3.6	2.5	1.2	146	6.7	111	24	2	0	0
	82			19	<0.2	254	90	732	0.3	214	10	3.9	2.6	1.2	145	4.2	113	16	2	0	0
	83			20	<0.2	25	162	88	0.3	229	10.3	4.7	4.1	0.6	149	4.2	117	17	0	0	0
	84			17	0.3	235	85	588	0.3	189	10.8	3.8	2.7	1.1	151	4.2	116	18	1	0	0
	85			16	0.2	89	69	352	0.3	197	9.4	4.2	3.1	1.1	144	6.4	115	16	2	0	0
	86			17	<0.2	104	74	174	0.3	218	10.1	4.3	3.2	1.1	147	5	114	18	2	0	0
	87			20	0.3	172	98	194	0.3	236	9.8	3.9	2.7	1.3	144	4.2	115	14	2	0	0
	88			16	0.5	159	85	226	0.3	228	10.2	3.9	2.7	1.1	145	4.1	117	14	2	0	0
	89	8	Mock Male	19	<0.2	30	70	68	0.4	267	10.5	5.2	4.3	0.9	145	5	113	17	0	0	0
	90			21	0.3	36	98	164	0.3	287	10.1	4.4	3.5	0.8	140	4.7	110	18	0	0	0
	91			23	<0.2	28	103	92	0.3	288	9.8	4.8	3.9	0.9	148	5.3	114	23	2	0	0
	92		Mock Female	27	<0.2	84	138	392	0.3	203	9	4.6	3.9	0.6	146	5.8	111	20	2	0	0
	93			19	<0.2	38	148	193	0.4	293	10	4.5	3.9	0.5	142	4	111	18	1	0	0
	94			25	<0.2	50	87	337	0.2	273	9.5	4.2	4.1	0.2	144	HEM	114	12	3	0	0
	95		Hoti Male	25	<0.2	31	105	92	0.3	265	9.9	4.6	3.5	1.1	142	5.1	108	23	0	0	0
	96			21	0.2	25	78	144	0.3	321	9.8	4.6	3.7	1	144	4.5	109	20	1	0	0
	97			21	0.4	29	96	68	0.3	319	10.4	4.8	3.8	0.9	148	4.5	110	21	0	0	0
	98			24	0.2	103	85	1119	0.3	307	9.4	4.2	3.3	0.9	145	6	108	21	3	0	0
	99		Hoti Female	15	0.3	21	151	82	0.4	208	9.4	4.9	3.9	1	147	5	110	21	0	0	0
	100			15	0.4	25	151	90	0.4	306	9.9	4.5	3.9	0.7	144	4.3	111	20	0	0	0
	101			16	0.2	36	138	153	0.3	317	10	4.9	3.8	1.1	144	3.9	112	17	0	0	0
	102			19	0.2	113	93	553	0.4	283	9.8	4.6	3.8	0.8	146	4	113	17	1	0	0
	103		MACCHF Male	16	0.4	105	103	172	0.2	162	10.5	4.5	2.9	1.7	151	6.5	107	27	2	0	0
	104			15	0.1	284	68	940	0	182	10.1	3.1	3.4	0.8	139	11.6	94	14	3	2	0
	105			16	0.4	178	148	247	0.3	190	11.9	4.3	2.4	1.9	153	5	110	19	0	0	0
	106			23	<0.2	157	118	288	0.3	204	10.5	4.4	2.8	1.6	150	6.6	117	15	2	1	0
	107			18	0.2	107	97	256	0.4	254	10.5	4.7	3.1	1.7	148	4.8	111	18	2	1	0
	108			24	0.3	108	110	213	0.4	167	11.3	4.9	2.8	2.1	151	4.8	113	20	1	1	0
	109		MACCHF Female	18	0.3	53	100	242	0.3	179	10.1	4.7	3.6	1.1	145	6.2	107	25	2	0	0
	110			17	<0.2	36	104	133	0.3	239	10.5	4.2	3.1	1.1	147	5.2	112	21	0	0	0
	111			18	0.3	62	100	118	0.3	286	10.4	5.1	3.7	1.4	146	3.9	114	15	0	0	0
	112			19	0.2	52	85	296	0.3	253	10.6	5	3.8	1.2	147	4.5	111	18	1	0	0
	113			24	0.4	50	83	240	0.3	257	10.4	4.5	3.1	1.5	142	4.4	113	12	2	0	0
	114			19	0.3	88	88	1052	0.2	231	10	4.1	3.1	1	148	5.1	115	11	3	0	0
	115			23	0.2	92	72	170	0.3	231	10.5	4.6	3.2	1.3	144	4.5	113	12	2	0	0
	116			25	0.3	118	75	1494	0.2	217	10	4.4	3.4	1	148	6	114	9	3	0	0
	117	14	Mock Male	30	0.3	24	94	45	0.3	242	10	4.7	4.1	0.6	145	4.5	107	22	0	0	0
	118			26	0.3	33	98	191	0.3	214	10.3	4.5	3.8	0.7	147	4.6	112	16	0	0	0
	119			18	<0.2	67	121	131	0.4	168	8.7	4.1	3.3	0.7	146	6	114	25	2	0	0
	120		Mock Female	25	0.3	28	170	74	0.3	199	9.4	4.7	4.1	0.6	145	4.8	110	21	0	0	0
	121			26	0.2	31	168	63	0.3	319	9.9	4.5	4	0.5	142	3.8	111	18	0	0	0
	122			29	<0.2	37	184	233	0.2	262	9.5	4.5	3.9	0.6	142	3.9	113	15	2	0	0
	123		Hoti Male	23	0.3	27	91	165	0.3	247	9.6	4.6	3.8	0.9	147	5.2	106	23	2	0	0
	124			28	<0.2	78	103	120	0.3	288	10	4.6	3.5	1.1	141	5.3	107	22	0	0	0
	125			31	0.3	133	110	267	0.3	279	10.1	4.4	3.5	0.9	145	4.7	111	20	0	1	0
	126			28	0.3	75	117	193	0.3	216	10.3	4.5	3.6	0.9	142	5.4	107	21	0	0	0
	127		Hoti Female	20	0.2	32	122	185	0.3	200	9.7	4.5	3.9	0.6	148	5.9	110	21	2	0	0
	128			16	0.4	61	127	261	0.3	289	9.5	4.7	3.9	0.8	143	4.2	110	16	0	0	0
	129			22	<0.2	23	139	96	0.3	203	9.8	4.6	3.8	0.8	146	4.1	113	19	0	0	0
	130			22	0.3	77	143	296	0.3	223	10.3	4.4	3.9	0.6	146	4.5	113	17	1	0	0
	131		MACCHF Male	22	<0.2	53	102	177	0.3	231	9.9	5.1	4.1	1	146	5.2	107	23	0	0	0
	132			25	<0.2	42	121	129	0.3	282	10.1	4.8	3.6	1.2	144	5.1	109	20	0	0	0
	133			23	<0.2	59	109	204	0.3	248	10.5	5	3.8	1.2	147	5	111	14	1	0	0
	134			24	0.3	56	113	270	0.3	251	10.2	4.9	3.8	1.1	148	4.8	111	15	0	0	0
	135			29	0.4	31	102	133	0.3	208	9.5	5	3.6	1.4	147	4.9	115	22	1	0	0
	136			24	0.3	26	100	96	0.3	260	9.3	5.1	3.8	1.3	145	4.3	114	21	0	0	0
	137			25	<0.2	65	112	155	0.3	272	10.6	5.4	4.1	1.4	145	4.6	111	17	0	0	0
	138			23	<0.2	46	88	298	0.2	267	10.1	5	3.9	1	143	4.8	112	15	3	0	0
	139		MACCHF Female	19	0.3	42	175	167	0.3	199	9.8	4.9	4	0.9	142	5.6	109	20	2	0	0
	140			17	<0.2	137	252	328	<0.1	192	9.6	4.4	3.3	1	147	5.2	115	21	0	0	0
	141			22	0.2	95	189	270	0.4	232	10	4.7	3.6	1.1	147	4.4	111	15	1	0	0
	142			19	0.4	76	55	698	0.5	236	10.1	4.5	3.8	0.7	146	5.8	110	14	3	0	0
	143			27	0.3	38	155	171	0.3	201	9	4.9	3.7	1.2	143	5.2	113	15	2	0	0
	144			28	0.4	34	109	141	0.3	236	9.4	4.9	3.9	1	145	3.9	118	13	2	1	0
	145			28	<0.2	36	168	117	0.3	253	10	4.8	4	0.8	146	4.4	117	12	3	2	0
	146			16	0.3	289	263	436	0.5	131	9.2	4.2	3.3	0.9	146	4.9	116	16	2	0	0
		~~~~ (Value) = Results suppressed
		Value indicates suppressed results if available
