# Supplementary figures and images for: Immunocompetent mouse model for Crimean-Congo hemorrhagic fever virus
Source: eLife journal article supplement (doi:10.7554/elife.63906), 2021-01-08

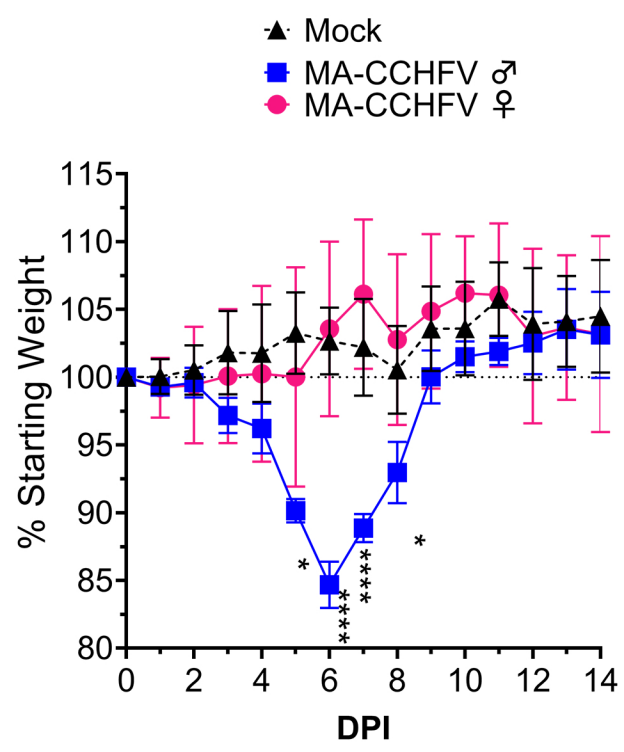

Supplement: supp [file elife_poa_e63906_Figure_1_figure_supplement_2.pdf › elife_poa_e63906_Figure_1_figure_supplement_2.pdf]

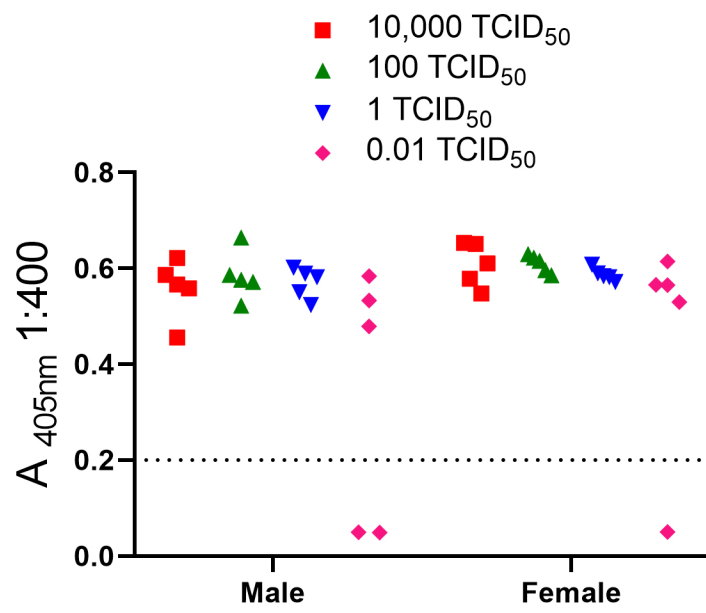

Supplement: supp [file elife_poa_e63906_Figure_1_figure_supplement_3.pdf › elife_poa_e63906_Figure_1_figure_supplement_3.pdf]

**A**

- △ 3 week-old WT ♂
- ▽ 3 week-old WT ♀

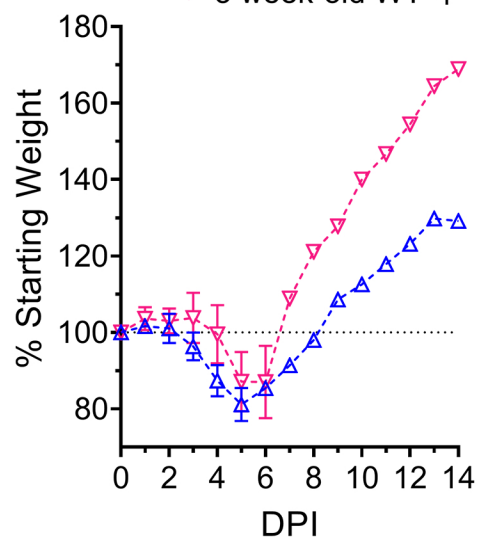**B**

- △ 3 week-old WT ♂
- ▽ 3 week-old WT ♀

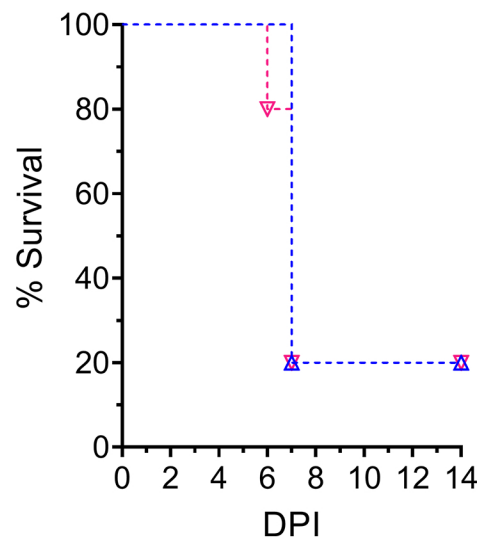

Supplement: supp [file elife_poa_e63906_Figure_2_figure_supplement_1.pdf › elife_poa_e63906_Figure_2_figure_supplement_1.pdf]

A

Mock

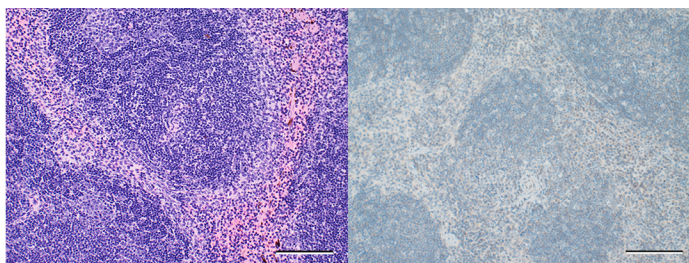

B

H&E      Male      IHC

H&E      Female      IHC

1 DPI

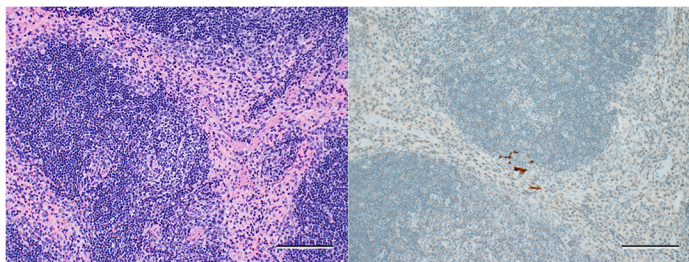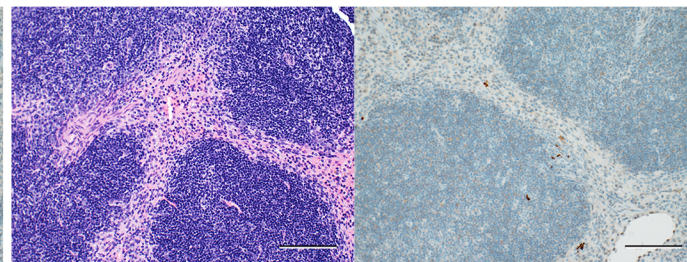

3 DPI

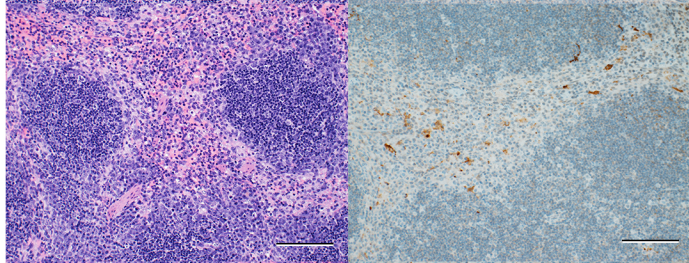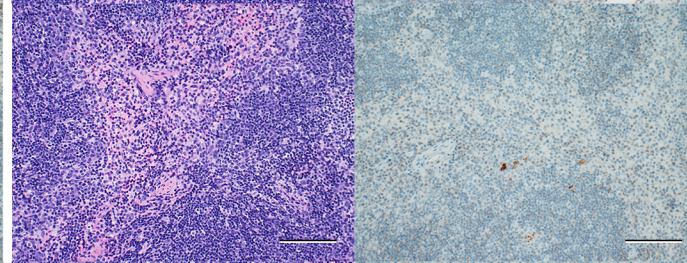

6 DPI

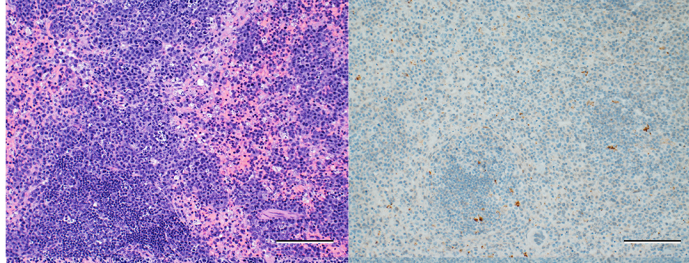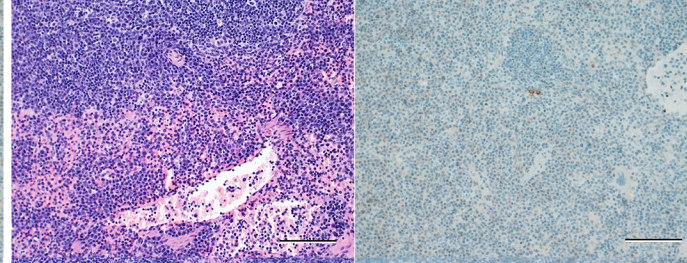

14 DPI

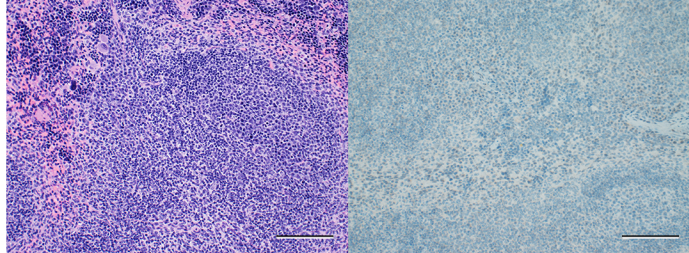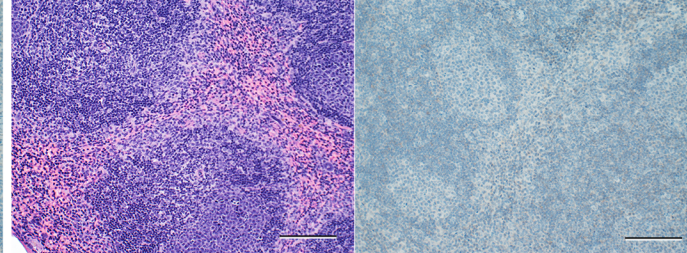

Supplement: supp [file elife_poa_e63906_Figure_4_figure_supplement_1.pdf › elife_poa_e63906_Figure_4_figure_supplement_1.pdf]

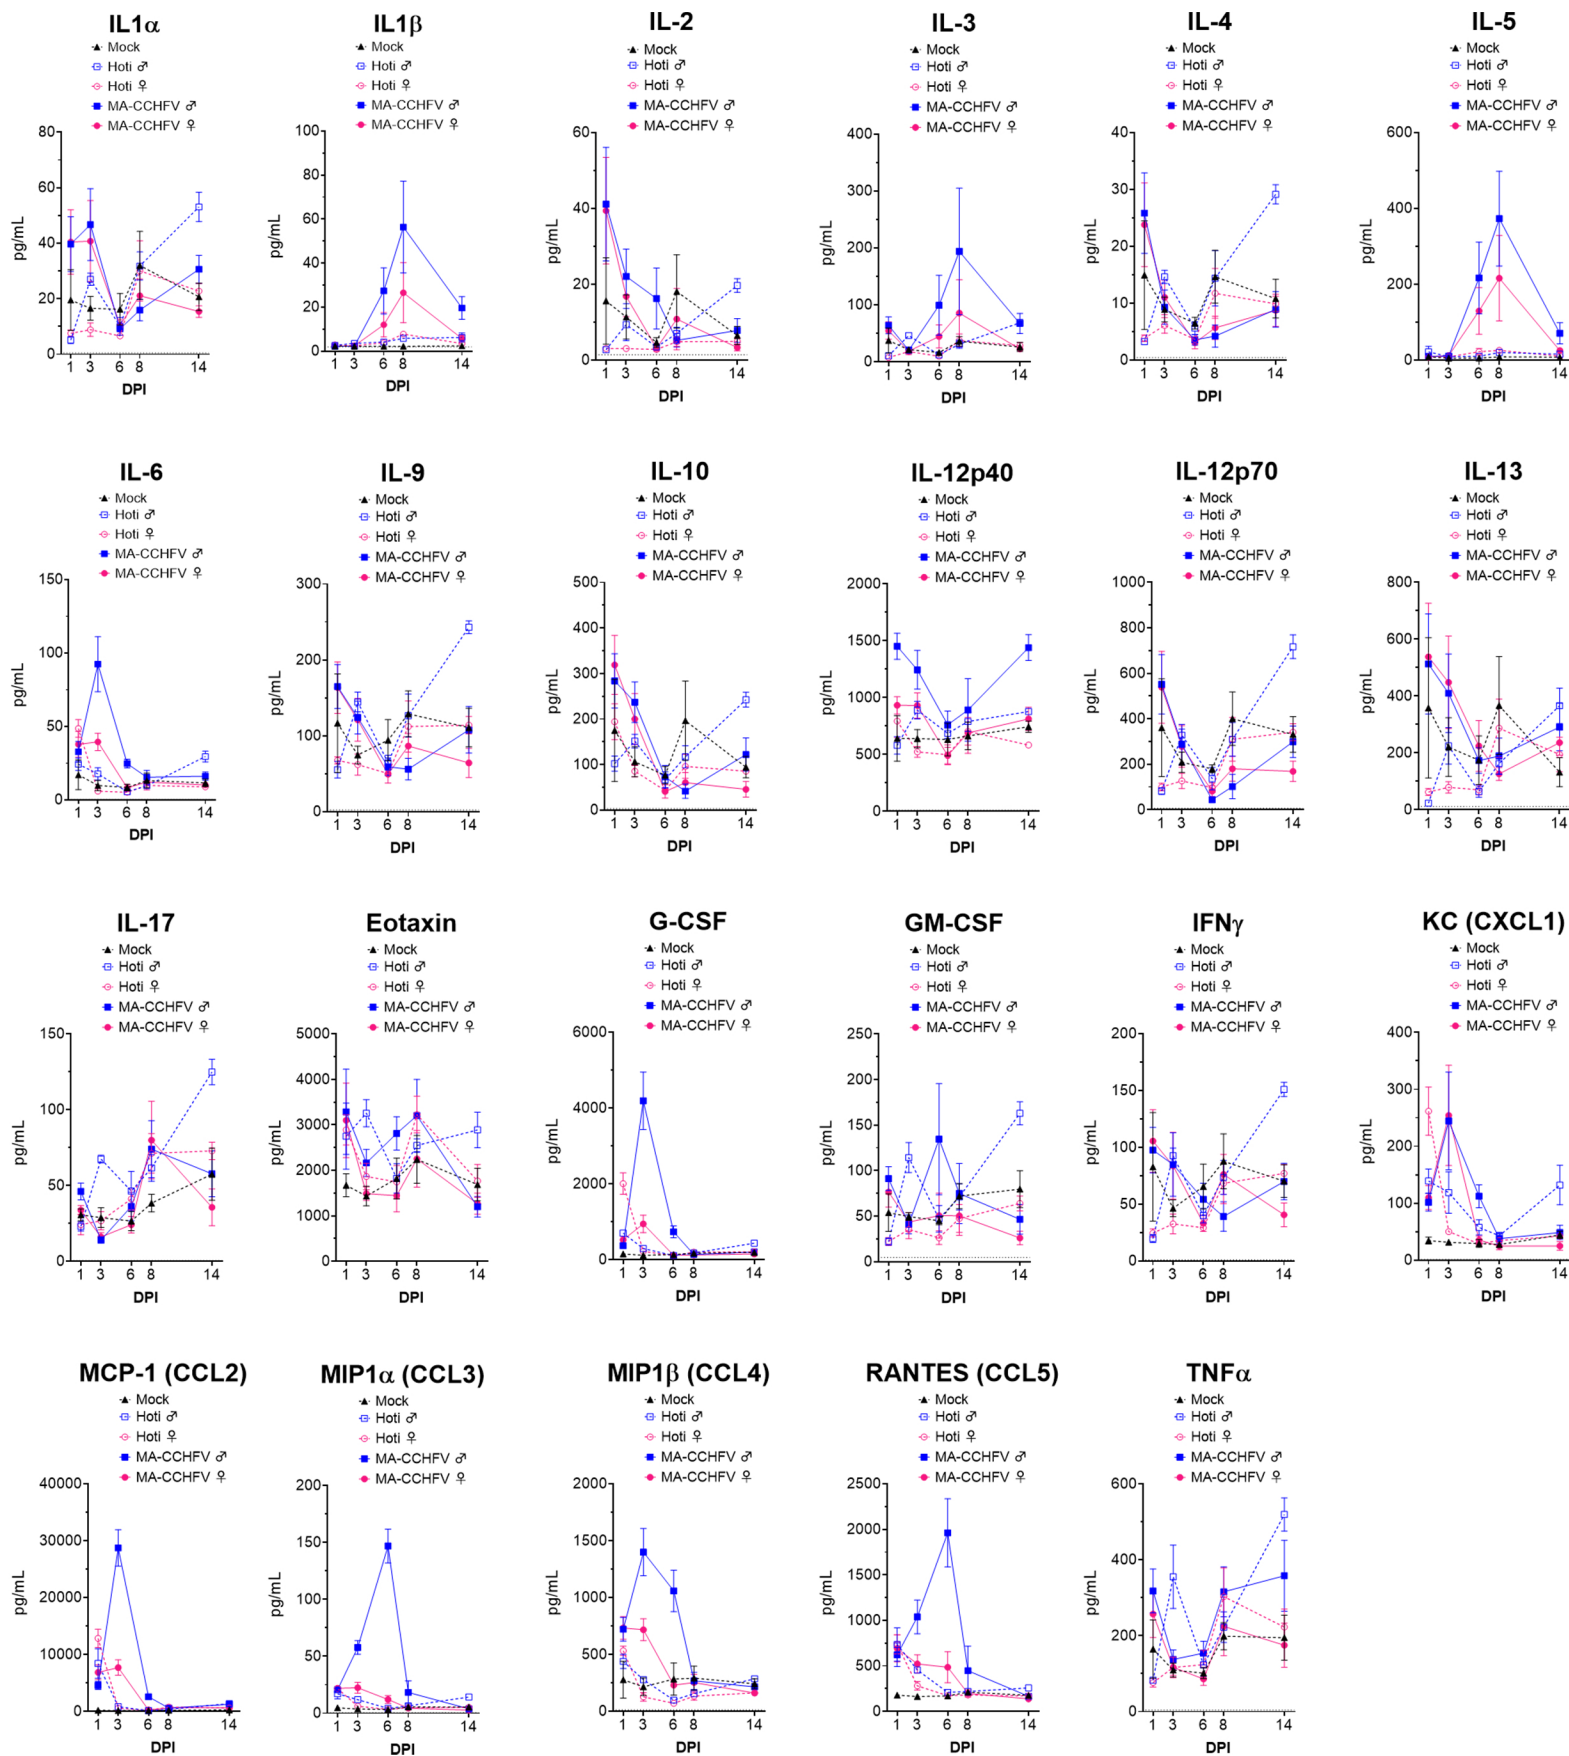

Supplement: supp [file elife_poa_e63906_Figure_5_figure_supplement_1.pdf › elife_poa_e63906_Figure_5_figure_supplement_1.pdf]
